# Supplementary material for: Impact of Face-to-Face Teaching in Addition to Electronic Learning on Personal Protective Equipment Doffing Proficiency in Student Paramedics: Randomized Controlled Trial
Source: MDPI journal article supplement (doi:10.3390/ijerph19053077), 2022-03-05
Supplement: s1 [file s1]

This is a Supplementary File to a full manuscript published in *International Journal of Environmental Research and Public Health*. For full copyright and citation information see article.

**Table S1. PPE doffing procedure for instructors**

| French original version                                                                     | English translated version                                                            |
|---------------------------------------------------------------------------------------------|---------------------------------------------------------------------------------------|
| <b>Procédure retrait EPI – À destination des formateurs·rices</b>                           | <b>PPE doffing procedure – For instructors</b>                                        |
| 1. Rester dans la zone contaminée                                                           | 1. Stay in contaminated zone                                                          |
| 2. Retrait et élimination non contaminant des gants (poubelle)                              | 2. Non-contaminating removal and disposal of gloves (trash can)                       |
| 3. Friction hydroalcoolique des mains                                                       | 3. Hydroalcoholic hand rubbing                                                        |
| 4. Ouvrir la combinaison                                                                    | 4. Open the coverall                                                                  |
| 5. Friction hydroalcoolique des mains                                                       | 5. Hydroalcoholic hand rubbing                                                        |
| 6. Enlever la capuche                                                                       | 6. Take off the hood                                                                  |
| 7. Ôter la combinaison en l'enroulant depuis l'intérieur, du haut jusqu'aux chevilles       | 7. Take off the coverall by rolling it up from the inside, from the top to the ankles |
| 8. Jeter la combinaison dans une poubelle fermée                                            | 8. Dispose the coverall in a closed trash can.                                        |
| 9. Passer en zone « non-contaminée »                                                        | 9. Go in non-contaminated zone                                                        |
| 10. Friction hydroalcoolique des mains                                                      | 10. Hydroalcoholic hand rubbing                                                       |
| 11. Retrait non contaminant des protections oculaires                                       | 11. Non-contaminating removal of eye protection                                       |
| 12. Placer les lunettes dans un sachet, sans toucher celui-ci, pour désinfection ultérieure | 12. Place the glasses in a bag, without touching it, for subsequent disinfection      |
| 13. Friction hydroalcoolique des mains                                                      | 13. Hydroalcoholic hand rubbing                                                       |
