# Supplementary material for: Impact of Face-to-Face Teaching in Addition to Electronic Learning on Personal Protective Equipment Doffing Proficiency in Student Paramedics: Randomized Controlled Trial
Source: MDPI journal article supplement (doi:10.3390/ijerph19053077), 2022-03-05
Supplement: s1 [file s1]

This is a Supplementary File to a full manuscript published in International Journal of Environmental Research and Public Health. For full copyright and citation information see article.

**Table S2. Assessment grid**

| French original version                                                                                                                                                                                                                          | English translated version                                                                                                                                                                                                                   |
|--------------------------------------------------------------------------------------------------------------------------------------------------------------------------------------------------------------------------------------------------|----------------------------------------------------------------------------------------------------------------------------------------------------------------------------------------------------------------------------------------------|
| <b>Numéro de la session (1 ou 2)</b>                                                                                                                                                                                                             | <b>Session number (1 or 2)</b>                                                                                                                                                                                                               |
| <b>Identifiant du participant</b>                                                                                                                                                                                                                | <b>Participant identifier</b>                                                                                                                                                                                                                |
| <b>Durée de la séquence</b> ( <i>en secondes ; dès que le premier élément est saisi jusqu'à ce que la procédure soit signalée comme terminée</i> )                                                                                               | <b>Sequence duration</b> ( <i>in seconds; from when the first element is taken until the procedure is completed</i> )                                                                                                                        |
|                                                                                                                                                                                                                                                  |                                                                                                                                                                                                                                              |
| <b><u>Déshabillage</u></b><br><i>Les étapes suivantes doivent être suivies dans l'ordre. L'absence d'une des actions citées ci-après <u>OU</u> le non-respect de l'ordre de la séquence représente une contamination (échec de la procédure)</i> | <b><u>Doffing</u></b><br><i>The following steps should be taken in order. The absence of one of the actions listed below <u>OR</u> the non-compliance with the order of the sequence represents contamination (failure of the procedure)</i> |
| <b>En zone contaminée</b>                                                                                                                                                                                                                        | <b>In contaminated zone</b>                                                                                                                                                                                                                  |
| <input type="checkbox"/> Retrait non contaminant des gants                                                                                                                                                                                       | <input type="checkbox"/> Non-contaminating glove removal                                                                                                                                                                                     |
| <input type="checkbox"/> Friction hydroalcoolique des mains                                                                                                                                                                                      | <input type="checkbox"/> Hydroalcoholic hand rubbing                                                                                                                                                                                         |
| <input type="checkbox"/> Ouverture de la combinaison                                                                                                                                                                                             | <input type="checkbox"/> Coverall opening                                                                                                                                                                                                    |
| <input type="checkbox"/> Friction hydroalcoolique des mains                                                                                                                                                                                      | <input type="checkbox"/> Hydroalcoholic hand rubbing                                                                                                                                                                                         |
| <input type="checkbox"/> Retrait de la combinaison sans contact avec l'extérieur de celle-ci (prêter particulièrement attention à la capuche) ; la jeter dans une poubelle fermée                                                                | <input type="checkbox"/> Coverall removal without outside contact of it (pay particular attention to the hood); throw it in a closed trash can                                                                                               |
| <b>En zone non-contaminée</b>                                                                                                                                                                                                                    | <b>In non-contaminated zone</b>                                                                                                                                                                                                              |
| <input type="checkbox"/> Friction hydroalcoolique des mains                                                                                                                                                                                      | <input type="checkbox"/> Hydroalcoholic hand rubbing                                                                                                                                                                                         |
| <input type="checkbox"/> Retrait des lunettes de protection ; les placer dans un sachet (sans le toucher) pour une désinfection ultérieure                                                                                                       | <input type="checkbox"/> Protective glasses removal; placed them in a bag (without touching it) for subsequent disinfection                                                                                                                  |
| <input type="checkbox"/> Friction hydroalcoolique des mains                                                                                                                                                                                      | <input type="checkbox"/> Hydroalcoholic hand rubbing                                                                                                                                                                                         |
